# Supplementary material for: Molecular biology insights into levofloxacin-loaded ZnO nanoparticles: a potent strategy against MDR Acinetobacter baumannii
Source: Royal Society of Chemistry journal article supplement (doi:10.1039/d5ra03081a), 2025-01-01
Supplement: d5ra03081a1.pdf [file d5ra03081a1.pdf]

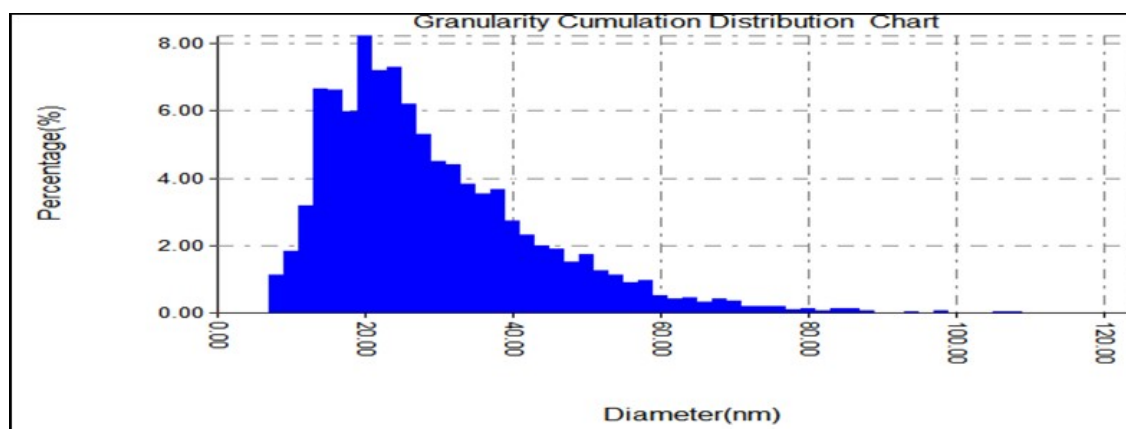

Figure S1: AFM Granularity Distribution Chart of ZnONPs.

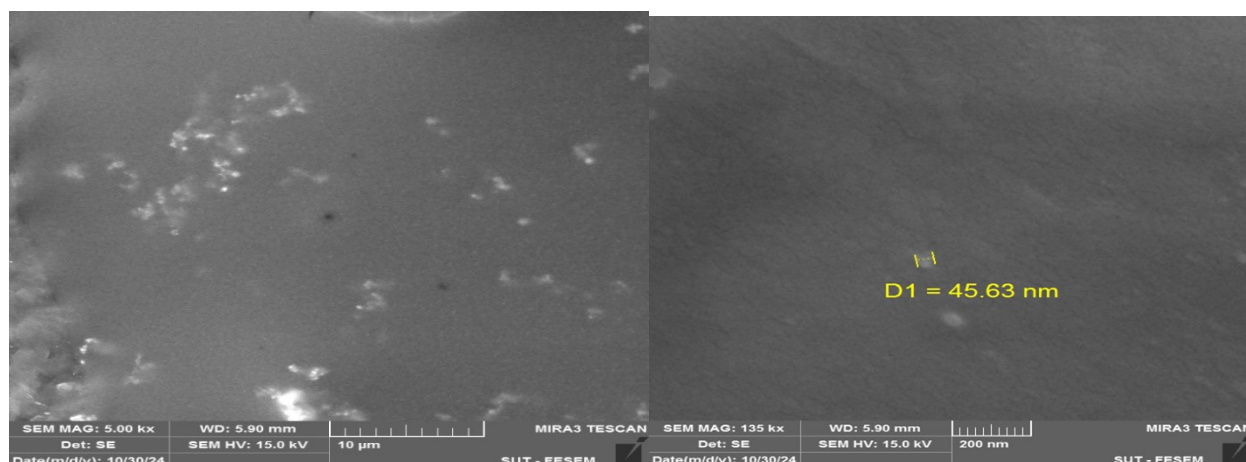

Figure S2: FESEM of ZnO nanoparticles (ZnONPs).

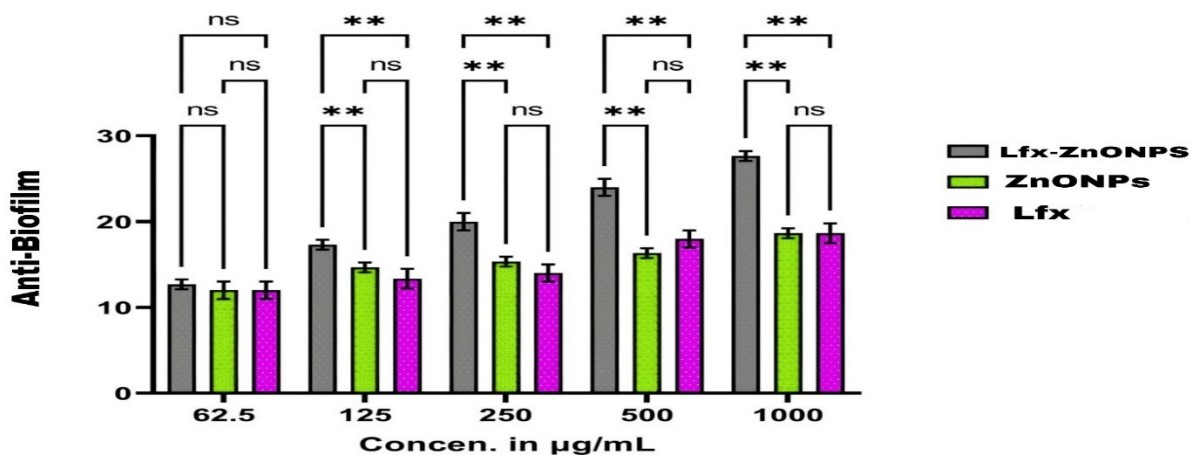

**Figure S3 : The inhibition percentage of biofilm formation of *Acinetobacter baumannii* in the presence of ZnONPs, Lfx and Lfx-ZnONPs.**

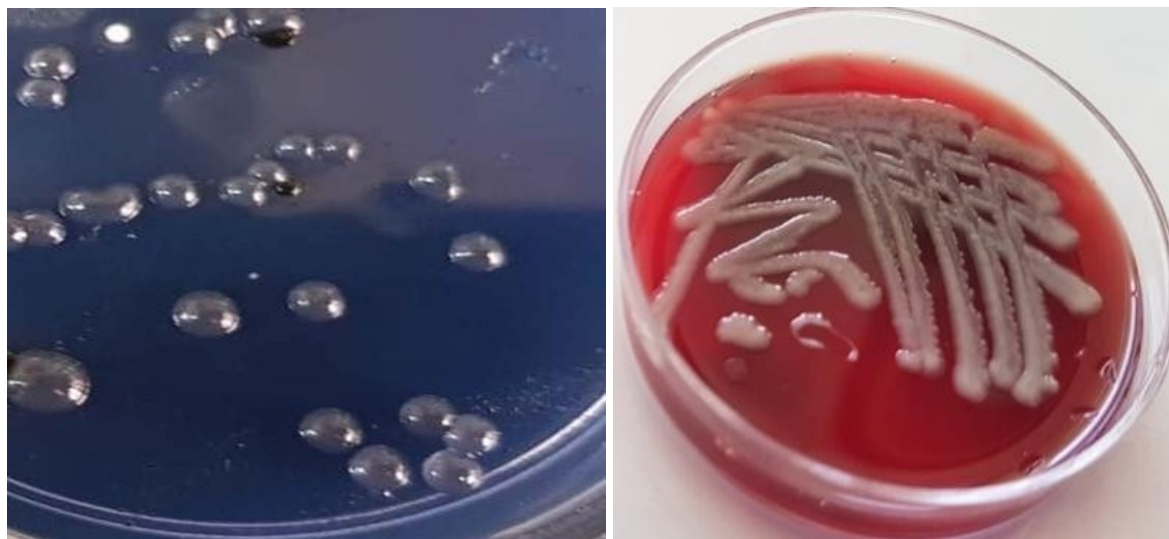

**Figure S4: *S. mitis* on a) *M. Salivarius* Agar, b) on blood agar**

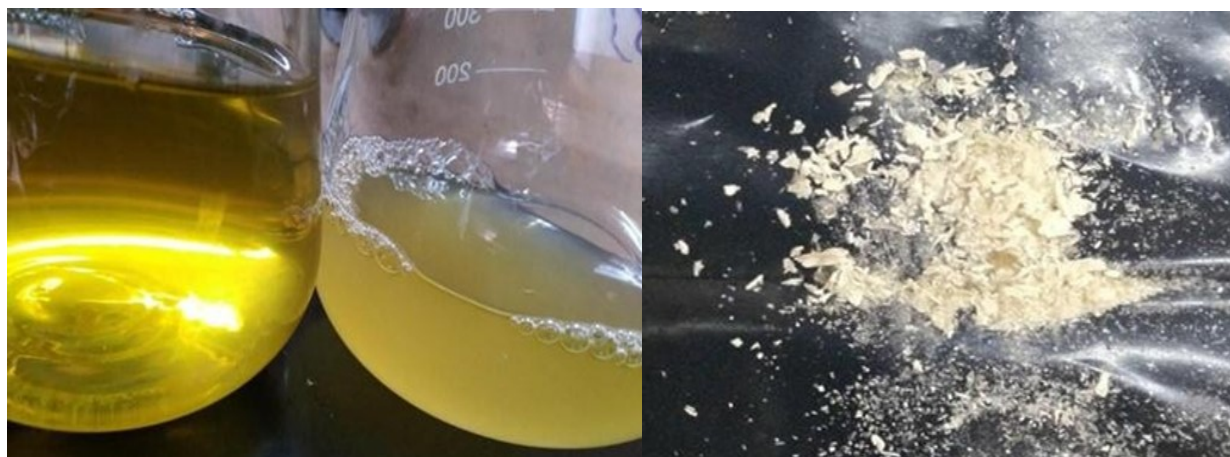

**Figure S5: Synthesis of ZnO NPs by A) *S. mutans* B) confirmation of powder form of ZnO NPs.**
